# Supplementary material
Source: PubMed Central journal article supplement (PMC549462)

*Riftia* A1B1 dimer

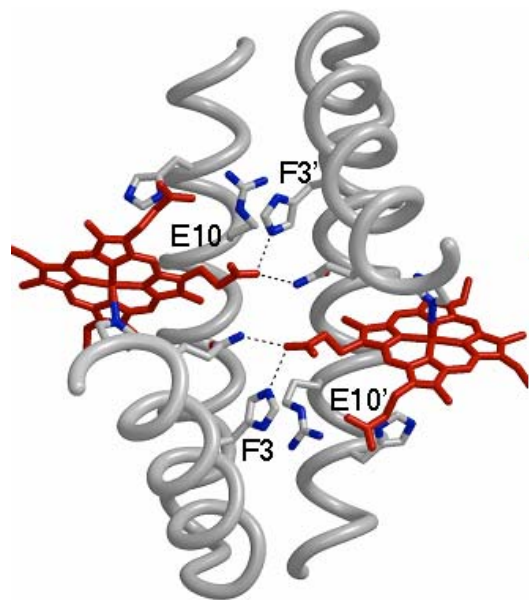

*Riftia* A2B2 dimer

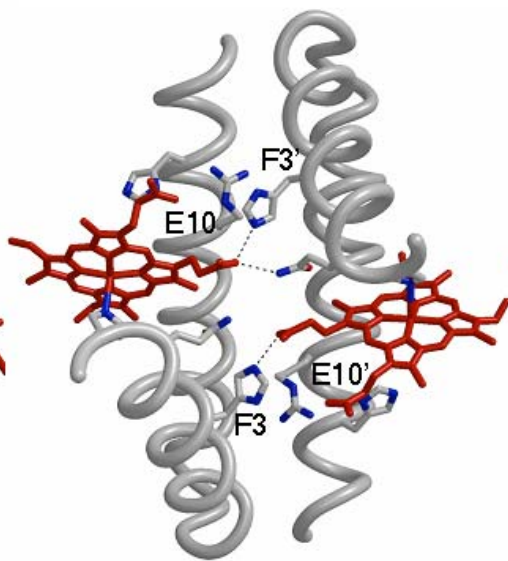

*Lumbricus* A1B1 dimer

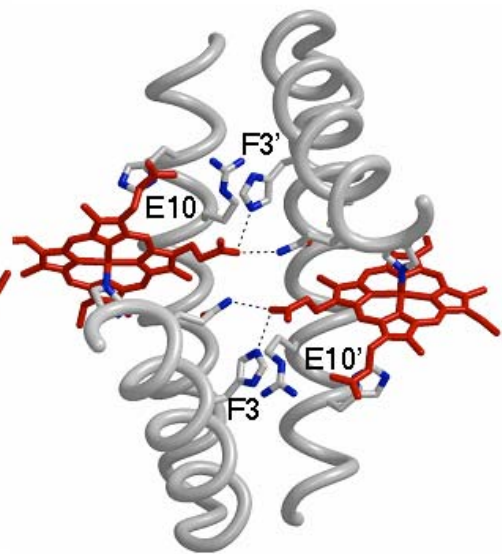

Supplement: pnas_102_8_2713__2.pdf [file pnas_102_8_2713__2.pdf]

Subunit A1

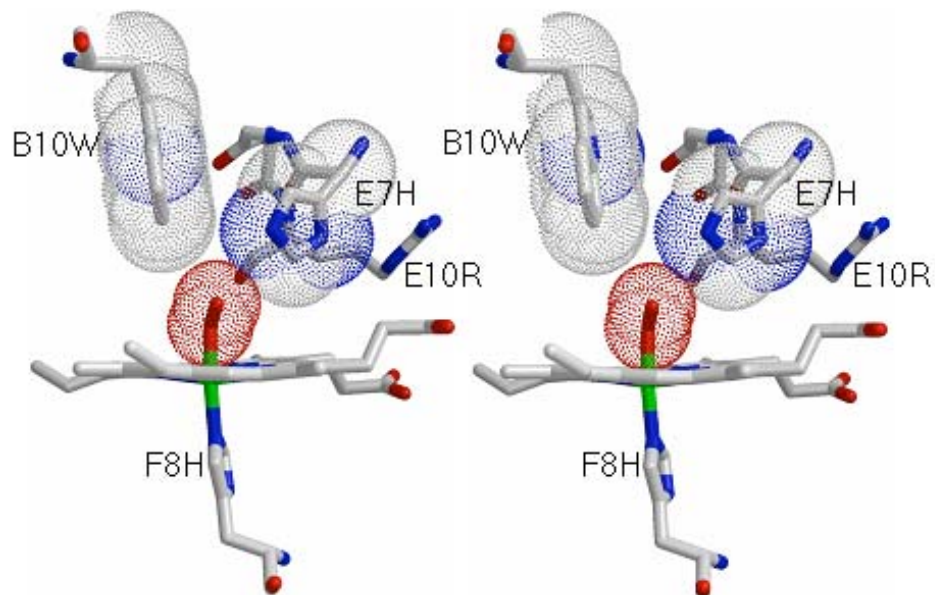

Subunit B1

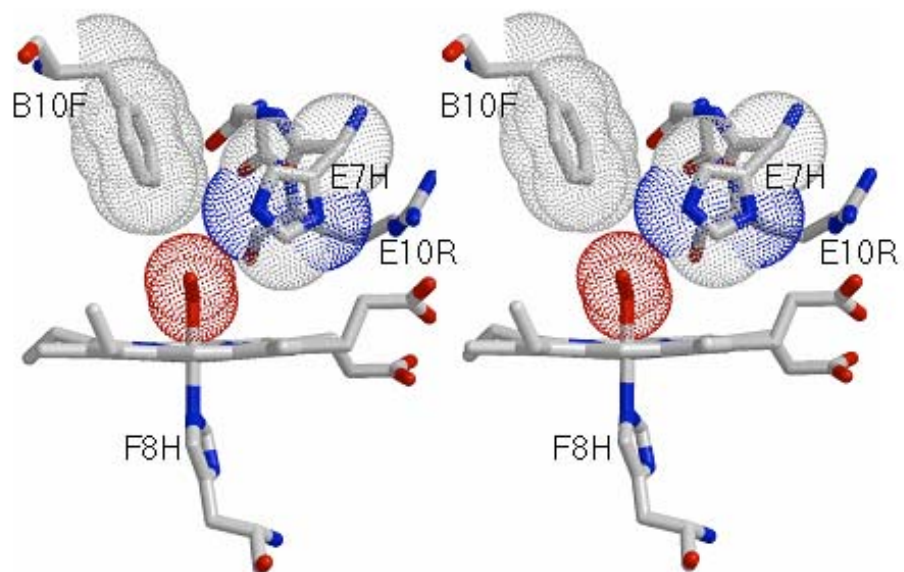

Supplement: pnas_102_8_2713__3.pdf [file pnas_102_8_2713__3.pdf]
